# Supplementary material for: IL-2 Immunotherapy to Recently HIV-1 Infected Adults Maintains the Numbers of IL-17 Expressing CD4+ T (TH17) Cells in the Periphery
Source: PubMed Central journal article supplement — J Clin Immunol. 2010 Jun 23;30(5):681–92. doi: 10.1007/s10875-010-9432-3 (PMC2935971; doi:10.1007/s10875-010-9432-3), 2010-06-23
Supplement: 10875_2010_9432_MOESM2_ESM.pdf [file 10875_2010_9432_MOESM2_ESM.pdf]

Supplemental Figure 2: Change in HIV-1 Gag CD8+ T cell Response Counts Between Time-Point 1 and 2 for ART and ART+IL-2 group.

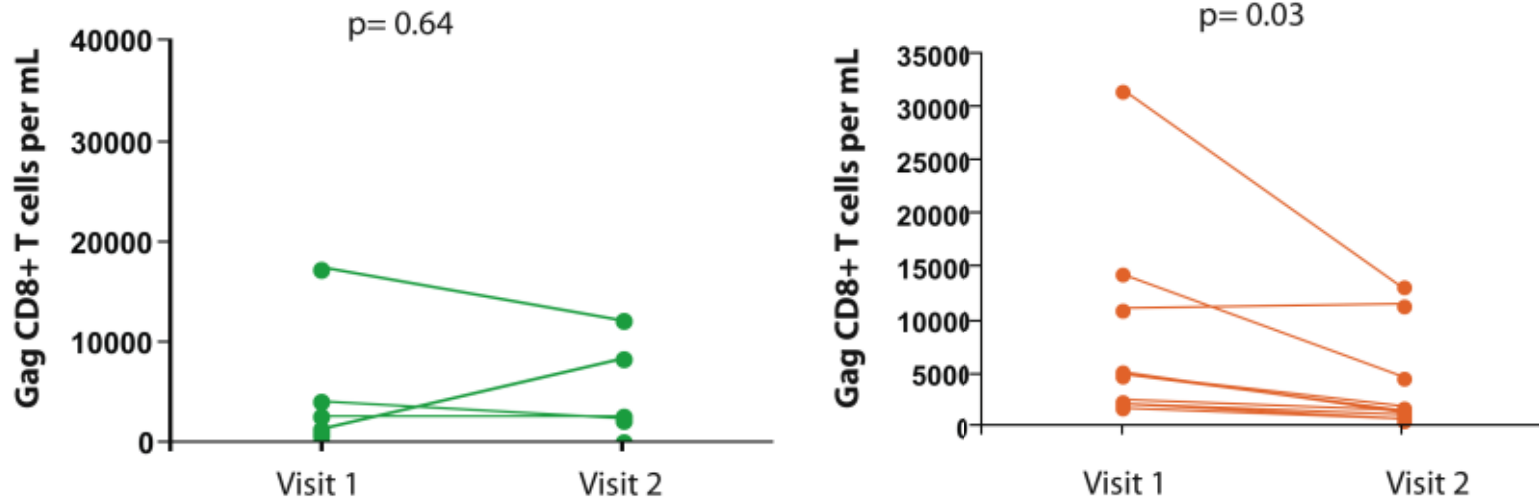

Supplemental Figure 2: On the left, in green, we see ART only patients at visit 1 and visit 2 values for HIV-1 Gag specific IFN- $\gamma$  CD8+ T cell response (counts) which do not change ( $p = 0.64$  as shown, Rank Sums Test). On the right, in orange, we see ART+IL-2 patients, visit 1 (pre-IL-2) and visit 2 (post-IL-2) changes in HIV-1 Gag specific IFN- $\gamma$  CD8+ T cell response (counts) that have decreased after IL-2 treatment ( $p = 0.03$  as shown, Rank Sums Test).
