# Supplementary figures and images for: IL-2 Immunotherapy to Recently HIV-1 Infected Adults Maintains the Numbers of IL-17 Expressing CD4+ T (TH17) Cells in the Periphery
Source: PubMed Central journal article supplement — J Clin Immunol. 2010 Jun 23;30(5):681–92. doi: 10.1007/s10875-010-9432-3 (PMC2935971; doi:10.1007/s10875-010-9432-3), 2010-06-23

Sup Figure 1 Measurements of T-regulatory Cells

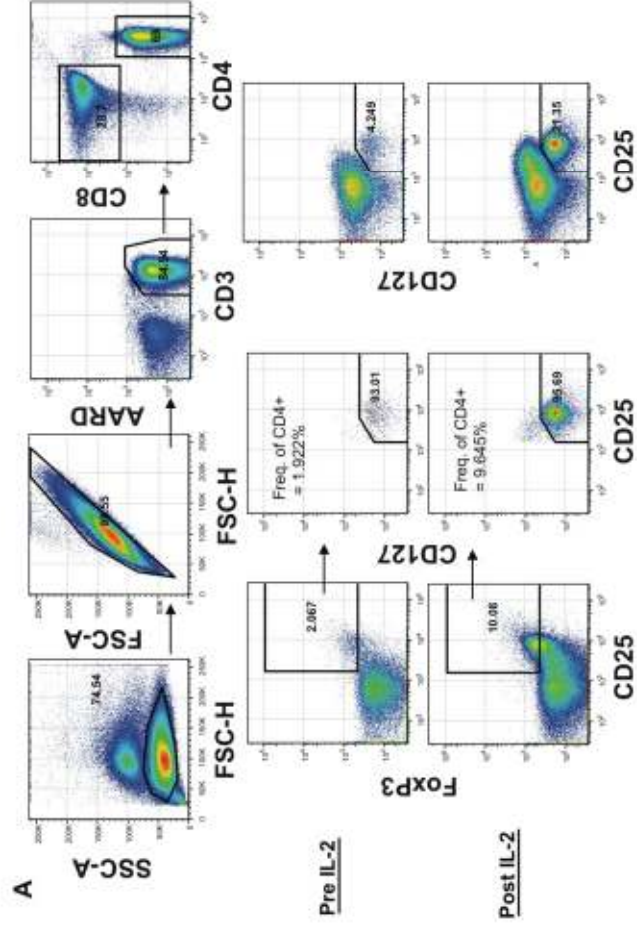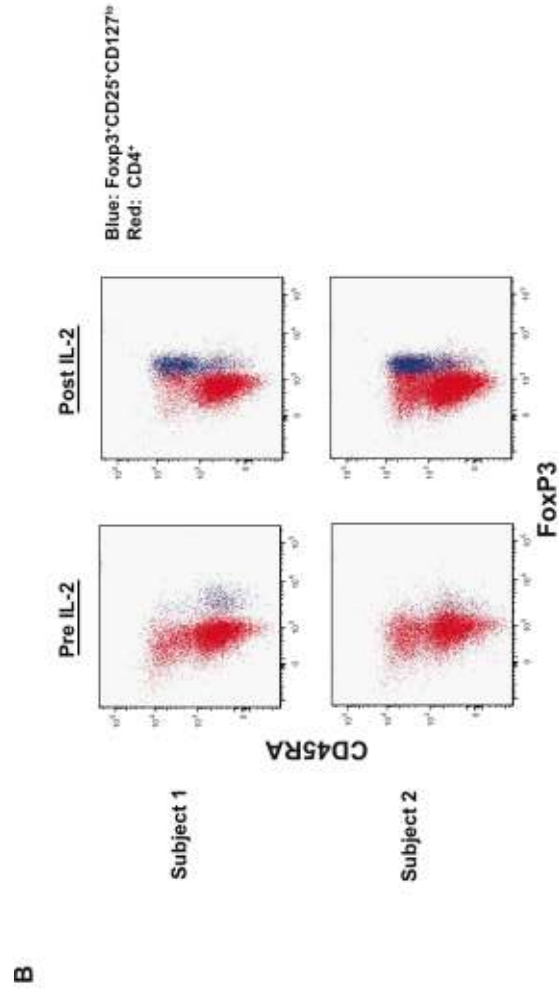

Supplement: 10875_2010_9432_MOESM1_ESM.pdf [file 10875_2010_9432_MOESM1_ESM.pdf]
